# Supplementary material for: Cost-Effectiveness of Insulin Degludec/Insulin Aspart Versus Biphasic Insulin Aspart in Patients with Type 2 Diabetes from a Danish Health-Care Perspective
Source: Springer Nature journal article supplement (doi:10.1007/s13300-016-0195-6), 2016-08-23
Supplement: MOESM1 [file 10609736]

**SUPPLEMENTARY MATERIAL**

**Table S1. Results of one-way sensitivity analysis.**

|                                                                                                          |                                                                                                                                                                                                                        | <b>ΔCost<br/>(DKK)</b> | <b>ΔQALY</b> | <b>ICER<br/>(DKK/QALY)</b> |
|----------------------------------------------------------------------------------------------------------|------------------------------------------------------------------------------------------------------------------------------------------------------------------------------------------------------------------------|------------------------|--------------|----------------------------|
| <b>Base-case</b>                                                                                         |                                                                                                                                                                                                                        | 18,126                 | 0.2224       | 81,508                     |
| <b>Time horizon</b><br>Base-case: 5 years                                                                | 1 year                                                                                                                                                                                                                 | 4003                   | 0.0365       | 109,652                    |
|                                                                                                          | 2 years                                                                                                                                                                                                                | 7692                   | 0.0851       | 90,433                     |
|                                                                                                          | 3 years                                                                                                                                                                                                                | 11,273                 | 0.1322       | 85,279                     |
|                                                                                                          | 10 years                                                                                                                                                                                                               | 33,586                 | 0.4259       | 78,867                     |
| <b>Discount rate</b><br>Base-case: 3% for both costs and effects                                         | 0%                                                                                                                                                                                                                     | 19,201                 | 0.2365       | 81,177                     |
|                                                                                                          | 5%                                                                                                                                                                                                                     | 17,476                 | 0.2138       | 81,729                     |
| <b>Hypoglycemia rates</b><br>Base-case: UKHSG <2 years on insulin. Non-severe 10.2/year; severe 0.7/year | Published event rates: non-severe daytime: 13.6, non-severe nocturnal: 8.3, and severe: 0.3 [35,36]                                                                                                                    | 20,416                 | 0.2875       | 71,012                     |
|                                                                                                          | Clinical trial data from combined analysis:<br>Non-severe daytime: 9.61 (titration), 10.50 (maintenance)<br>Non-severe nocturnal: 1.96 (titration), 2.30 (maintenance)<br>Severe: 0.13 (titration), 0.23 (maintenance) | 22,006                 | 0.1434       | 153,440                    |
| <b>Clinical trial data</b><br>Base-case: Combined analysis                                               | Clinical trial data from global clinical trial [7]                                                                                                                                                                     | 24,947                 | 0.2488       | 100,289                    |
| <b>Hypoglycemia costs</b><br>Base-case: Costs based on clinical trial resource use                       | Severe hypoglycemia event cost +20%                                                                                                                                                                                    | 16,914                 | 0.2224       | 76,049                     |
|                                                                                                          | Severe hypoglycemia event cost -20%                                                                                                                                                                                    | 19,338                 | 0.2224       | 86,968                     |

|                                                                                                                       |                                                               | <b>ΔCost<br/>(DKK)</b> | <b>ΔQALY</b> | <b>ICER<br/>(DKK/QALY)</b> |
|-----------------------------------------------------------------------------------------------------------------------|---------------------------------------------------------------|------------------------|--------------|----------------------------|
| <b>BMI treatment difference</b><br>Base-case: IDegAsp – BIAsp 30; BMI treatment difference of –0.19.                  | BMI treatment difference: 0                                   | 18,126                 | 0.2174       | 83,383                     |
| <b>Hypoglycemia disutility</b><br>Base-case: severe 0.0565, non-severe daytime 0.0041 and non-severe nocturnal 0.0067 | Published disutilities: severe 0.0118, non-severe 0.0036 [37] | 18,126                 | 0.0865       | 209,446                    |
| <b>SMBG disutility</b><br>Base-case: SMBG disutility 0.0000221                                                        | Disutility: 0                                                 | 18,126                 | 0.2216       | 81,797                     |
| <b>BMI disutility</b><br>Base-case: 0.0061                                                                            | Disutility: 0                                                 | 18,126                 | 0.2174       | 83,383                     |

*ICER* incremental cost-effectiveness ratio, *QALY* quality-adjusted life year, *SMBG* self-measured blood glucose, *UKHSG* UK Hypoglycaemia Study Group.

**Fig. S1 Cost-effectiveness acceptability curve.** *BIAsp 30* biphasic insulin aspart, *BID* twice daily, *IDegAsp* insulin degludec/insulin aspart, *QALY* quality-adjusted life year.

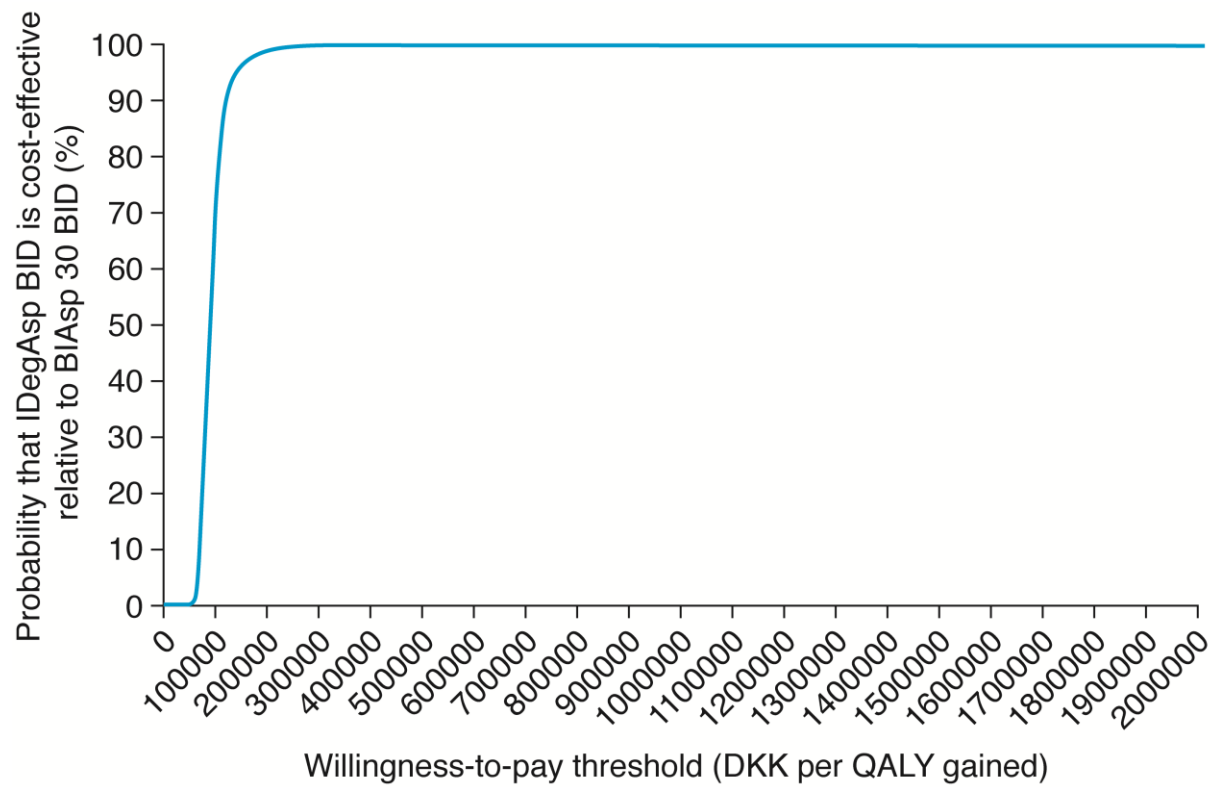

**Table S2. Probabilistic sensitivity analyses.**

| <b>Hypoglycemia rate ratios</b>    | <b>Rate ratio</b> | <b>P value</b> | <b>SE</b> | <b>Distribution</b> |
|------------------------------------|-------------------|----------------|-----------|---------------------|
| <i>Titration (0–16 weeks)</i>      |                   |                |           |                     |
| Daytime non-severe hypoglycemia    | 1.00 <sup>†</sup> | 0.7782         | 0.111     | Lognormal           |
| Nocturnal non-severe hypoglycemia  | 0.46              | <0.0001        | 0.182     | Lognormal           |
| Severe hypoglycemia                | 1.00 <sup>†</sup> | 0.7802         | 0.502     | Lognormal           |
| <i>Maintenance (16–26 weeks)</i>   |                   |                |           |                     |
| Daytime non-severe hypoglycemia    | 0.76              | 0.0207         | 0.121     | Lognormal           |
| Nocturnal non-severe hypoglycemia  | 0.39              | <0.0001        | 0.214     | Lognormal           |
| Severe hypoglycemia                | 0.16              | 0.0061         | 0.671     | Lognormal           |
| <b>Doses (BIAsp 30)</b>            | <b>Mean</b>       | <b>P value</b> | <b>SE</b> | <b>Distribution</b> |
| At baseline                        | 45.7              |                | 1.513     | Normal              |
| After titration (week 16)          | 81.8              |                | 2.558     | Normal              |
| After total trial period (week 26) | 86.2              |                | 2.795     | Normal              |
| <b>Dose ratio</b>                  | <b>Dose ratio</b> | <b>P value</b> | <b>SE</b> | <b>Distribution</b> |
| At baseline                        | 1.00 <sup>§</sup> |                |           | Assumed             |
| After titration (week 16)          | 0.84              | <0.0001        | 0.026     | Lognormal           |
| After total trial period (week 26) | 0.84              | <0.0001        | 0.027     | Lognormal           |
| <b>BMI change (BIAsp 30)</b>       | <b>Mean</b>       | <b>P value</b> | <b>SE</b> | <b>Distribution</b> |
| At baseline                        | 0.0               |                | 0.0       | Assumed             |
| After titration (week 16)          | 0.5               |                | 0.047     | Normal              |
| After total trial period (week 26) | 0.7               |                | 0.058     | Normal              |
| <b>BMI change difference</b>       | <b>Mean diff.</b> | <b>P value</b> | <b>SE</b> | <b>Distribution</b> |
| At baseline                        | 0.0               |                |           | Assumed             |
| After titration (week 16)          | 0.0 <sup>‡</sup>  | 0.143          | 0.060     | Normal              |
| After total trial period (week 26) | −0.19             | 0.012          | 0.070     | Normal              |
| <b>Hypoglycemia disutilities</b>   | <b>Mean</b>       | <b>P value</b> | <b>SE</b> | <b>Distribution</b> |
| Non-severe – daytime               | 0.0041            |                | 0.000     | Normal              |
| Non-severe – Nocturnal             | 0.0067            |                | 0.000     | Normal              |
| Severe                             | 0.0565            |                | 0.002     | Normal              |
| <b>SMBG disutility</b>             | <b>Mean</b>       | <b>P value</b> | <b>SE</b> | <b>Distribution</b> |
| Disutility per test                | −0.0000221        |                | 0.0000058 | Normal              |
| <b>BMI disutility</b>              | <b>Mean</b>       | <b>P value</b> | <b>SE</b> | <b>Distribution</b> |
| TTO index prediction               | 0.0061            | <0.001         | 0.001     | Normal              |

*BIAsp 30* biphasic insulin aspart, *BMI* body mass index, *CI* confidence interval, *SE* standard error, *SMBG* self-measured blood glucose, *TTO* time trade off.

<sup>†</sup> Set to 1 because of non-significance; <sup>‡</sup> Set to 0 because of non-significance; <sup>§</sup> Assumed.
